# Supplementary material for: Competition for Space Induces Cell Elimination through Compaction-Driven ERK Downregulation
Source: PubMed Central journal article supplement — Curr Biol. 2019 Jan 7;29(1):23–34.e8. doi: 10.1016/j.cub.2018.11.007 (PMC6331351; doi:10.1016/j.cub.2018.11.007), 2019-01-07
Supplement: mmc2.pdf [file mmc2.pdf]

## Methods S1. Adaptive Local z-Projection Macro (MATLAB), Related to Star methods

```
%Matlab macro building a local projection of two channels using one channel
as %reference
% Can be used to locally follow the curvature of tissue and project only a
% limited number of planes for the second channel.
% Ideally reference channel has to be E-cad::GFP or any signal that is
% restricted in a single plane.
% Each z-stack has to be saved in a folder called 'zstacks' with the
% following structure : "C0_time.tif" and "C1_time.tif" with time being the
% frame number
%
clear all
close all
folder='zstacks';

%Main variables-----

zmax=40      % Number of z plane;
tmax=100;    % Number of time;
t0=1;        % Number of time;
METH=1;      % Choice for the method of local projection: 0=MEAN , 1=STDdev
dxy=40;      % Size of the analysis window/2
xystep=20;   % Sampling frequency (step size for shifting the window)
dz=3;        % Number of z planes that will be projected for the second
channel
dz0=6;       % Shift of the central position of the projection for the second
channel compared to the reference channel
gg=50        % Size of the smooth window that will be used to smooth the z
profile
zcad=1;      % Range of max projection for the reference channel (here E-cad)
% -----

%%
name_ref= uigetfile( ['*.tif'], 'Open the first TIFF Zstack of the Reference
channel' ) ;
name_ca= uigetfile( ['*.tif'], 'Open the first TIFF Zstack of the cic
channel' ) ;
%%
mkdir local_zprojection
tic
% Loop for all the time (from t0 to tmax)
for t=t0:1:tmax

    name=[name_ref(1:size(name_ref,2)-7), '_t', num2str(t),'.TIF']
    name_CIC=[name_ca(1:size(name_ca,2)-7), '_t', num2str(t),'.TIF']
    I0=imread(name,1);
    mean_z=zeros(1,zmax);
    STANDARD_z=zeros(1,zmax);
    sum_all=zeros(size(I0));sum_all=double(sum_all);
    for z=1:zmax
        I0=imread(name,z);
        mean_z(z)=mean(I0(:));
```

```

        STANDARD_z(z)=std2(I0(:));
        sum_all=sum_all+double(I0);
    end
    sum_all=sum_all/zmax;
    zcenter=find(mean_z==max(mean_z(:)));

%%
    sx=size(I0,1);
    sy=size(I0,2);
    tic
    XYZ=zeros(zmax, sx,sy);
    X=[];Y=X;
    z1=1;
    z2=zmax;
    for z=z1:z2

        I0=imread(name,z);
        i=0;
        for x=[1:xystep:sx sx] %take care if final 1:xystep:sx is not equal
to sx
            i=i+1;
            j=0;
            for y=[1:xystep:sy sy]
                j=j+1;
                X(i,j)=x;
                Y(i,j)=y;
                rect=[y-dxy x-dxy 2*dxy 2*dxy ];
                Icut=imcrop(I0, rect);
                if METH==0 %Calculate the mean intensity in the analysis
window
                    XYZ(z,i,j)=mean(Icut(:));
                elseif METH==1 %Calculate the standard deviation of intensity
in the analysis window
                    XYZ(z,i,j)=std2(Icut(:));
                end
            end
        end
        end
        imax=i;
        jmax=j;
        toc
        pos_z=[];
        for i=1:imax
            for j=1:jmax
                if isnan(max(XYZ(z1:z2,i,j)))
                    pos_z(i,j)=0;
                else
                    pos_z(i,j)=min(find(XYZ(:,i,j)==max(XYZ(z1:z2,i,j)))));%min to
remove singleton
                end
            end
        end
        end
        x=X(:,1)';
        y=Y(1,:);
        [xq,yq]=meshgrid(1:sy,1:sx);
        NEW_pos_z=interp2(y,x,pos_z,xq,yq);

```

```

%% Filter the z profile (gg is the size of the gaussian filter window)
h=fspecial('gaussian',gg,gg);
TEST=imfilter(NEW_pos_z,h);
NEW_pos_z2=round(TEST);
I0=imread(name,1);
TEMP=zeros(size(I0));
I0Z=zeros(zmax,size(I0,1),size(I0,2));
for z=1:zmax
    z;
    I0Z(z, :, :)=imread(name,z);
end
% Local projection of the reference channel based on the local position
% defined above
for x=1:size(I0,1)
    for y=1:size(I0,2)
        z0=round(NEW_pos_z2(x,y));
        z1=max(z0-zcad,1);
        z2=min(z0+zcad,zmax);
        TEMP(x,y)=max(I0Z(z1:z2,x,y));
    end
end
I_CAD=TEMP;

% Local projection on the second channel based on the local plane of
reference (New_pos_z2 matric)
I0=imread(name_CIC,1);
TEMP=zeros(size(I0));
I0Z=zeros(zmax,size(I0,1),size(I0,2));
for z=1:zmax
    z;
    I0Z(z, :, :)=imread(name_CIC,z);
end

for x=1:size(I0,1)
    for y=1:size(I0,2)
        z0=round(NEW_pos_z2(x,y))+dz0;
        z1=max(z0-dz,1);
        z2=max(z0+dz,1);
        z2=min(z2,zmax);
        TEMP(x,y)=max(I0Z(z1:z2,x,y));
    end
end
I_CIC=TEMP;
if t==1
    imwrite(uint16(I_CAD),['local_zprojection\cad_localproject.tif'])
    imwrite(uint16(I_CIC),['local_zprojection\yfp_localproject.tif'])
else
imwrite(uint16(I_CAD),['local_zprojection\cad_localproject.tif'],'WriteMode',
'Append')

imwrite(uint16(I_CIC),['local_zprojection\yfp_localproject.tif'],'WriteMode',
'Append')
end
toc

```

```
%%  
end  
toc
```
